# Supplementary material
Source: PubMed Central journal article supplement (PMC6331165)
Supplement: ml8b00530_si_002.pdf [file ml8b00530_si_002.pdf]

# SUPPORTING INFORMATION

## Synthesis of a 6-Aza-Isoindolinone based Inhibitor of Phosphoinositide 3-kinase $\gamma$ via Ruthenium-Catalyzed [2 + 2 + 2] Cyclotrimerization

Philip N. Collier, Advaita Panchagnula, Hardwin O'Dowd, Arnaud Le Tiran and Alex M. Aronov

Vertex Pharmaceuticals Incorporated, 50 Northern Avenue, Boston, Massachusetts 02210, United States

### Contents of Supporting Information:

|                                                           |    |
|-----------------------------------------------------------|----|
| 1. Description of Biochemical Assays                      | S2 |
| a. PI3K Inhibition assays                                 | S2 |
| b. Reference PI3K inhibitors                              | S3 |
| 2. Description of Cellular Assay                          | S4 |
| 3. Synthetic Procedures and Characterization of Compounds | S5 |
| 4. Abbreviations                                          | S9 |

## 1. Description of Biochemical Assays

### 1a. PI3K Inhibition Assays

The compounds of interest were dissolved in DMSO to make 10 mM initial stock solutions. Serial dilutions in DMSO were then made to obtain the final solutions for the assay. Using a Biomek FX from Beckman Coulter, a 1.5  $\mu$ L aliquot aliquot of DMSO or inhibitor in DMSO was added to each individual well (hereafter, “test well”) in a 96 well polystyrene plate [Corning, Costar Item No. 3697]. Using a Titertek Multidrop, 50  $\mu$ L of ATP Mix [50 mM HEPES (pH 7.5), 3 mM  $MgCl_2$ , 100 mM NaCl, 2 mM DTT, 1 mM EGTA, 0.03% CHAPS, and ATP (100  $\mu$ Ci/ $\mu$ mol  $^{33}P$ -ATP) (See Table 1 for ATP concentrations, each equal to  $K_m$ )] was added to each well. To initiate the reaction, 50  $\mu$ L of Reaction Mixture [50 mM HEPES (pH 7.5), 3 mM  $MgCl_2$ , 100 mM NaCl, 2 mM DTT, 1 mM EGTA, 0.03% CHAPS, 20  $\mu$ M PIP2 (phosphatidylinositol(4,5)-bisphosphate diC16 (PI(4,5)P<sub>2</sub>; Avanti Polar Lipids, Cat. No. 840046P) and PI3K isoform of interest (See Table 1 for isoform concentrations)] was added to each well, followed by incubating the wells for 15 min at room temperature.

**Table 1**

| PI3K Isoform                              | PI3K $\alpha$ | PI3K $\beta$ | PI3K $\gamma$ | PI3K $\delta$ |
|-------------------------------------------|---------------|--------------|---------------|---------------|
| Final ATP concentration (equal to $K_m$ ) | 5 $\mu$ M     | 27 $\mu$ M   | 10 $\mu$ M    | 7 $\mu$ M     |
| Final enzyme concentration                | 4 nM          | 20 nM        | 6 nM          | 6 nM          |

After incubation, the reactions in each well were quenched by addition of 50  $\mu$ L of stop solution [30% TCA/water, 10 mM ATP]. Each quenched reaction mixture was then transferred to a 96 well glass fiber filter plate [Corning, Costar Item No. 3511]. The plate was vacuum-filtered and washed three times with 150  $\mu$ L of 5% TCA/water in a modified Bio-Tek Instruments ELX-405 Auto Plate Washer. 50  $\mu$ L of scintillation fluid was added to each well and the plate read on a Perkin-Elmer TopCount™ NXT liquid scintillation counter to obtain  $^{33}P$ -counts.

After removing mean background values for all of the data points,  $K_i$ (app) data were calculated from non-linear regression analysis of the initial rate data using the Prism software package (GraphPad Prism, GraphPad Software, San Diego California, USA). The data were fit to the Morrison equation for competitive tight binding  $K_i$  as described by Copeland (Reference: RA Copeland, *Enzymes*, 2nd edition, Wiley, 2000, Equation 9.6). Compound potencies were determined in singlicate. Average  $K_i$ s are reported for compounds that have multiple determinations. The Average of the Robust MSR for PI3K  $\alpha$ ,  $\beta$ ,  $\gamma$ ,  $\delta$  were determined to be 3.2, 3.0, 3.1, and 2.7 respectively. (References: JBiomolScreen\_MSR, AMC\_Robust\_Statistics, Minimum Significant Ratio – A Statistic to Assess Assay Variability)

### Statistics on compound 2:

| Average $\pm$ stdev (number of determinations) |                       |
|------------------------------------------------|-----------------------|
| cpd                                            | PI3K $\gamma$         |
| 2                                              | 0.014 $\pm$ 0.006 (4) |

## 1b. Reference PI3K inhibitors

In-house versus reported values

| Molecule | PI3K $\alpha$ | PI3K $\beta$ | PI3K $\gamma$ | PI3K $\delta$ | ALIAS                                   | $\alpha/\beta/\gamma/\delta$ ( $\mu$ M)<br><a href="http://www.selleckchem.com/PI3K.html">http://www.selleckchem.com/PI3K.html</a> | <a href="http://www.selleckchem.com/PI3K.html">all data from from Selleck Chem site: http://www.selleckchem.com/PI3K.html</a>                                                                                                                                                                           |
|----------|---------------|--------------|---------------|---------------|-----------------------------------------|------------------------------------------------------------------------------------------------------------------------------------|---------------------------------------------------------------------------------------------------------------------------------------------------------------------------------------------------------------------------------------------------------------------------------------------------------|
|          | 0.14          | 0.028        | 0.008         | 0.005         | ABBV-954, Duvelisib, INK-1197, IPI-145, | 1.6 / 0.085 / 0.027 / 0.002                                                                                                        | Duvelisib is a selective p100 $\delta$ inhibitor with IC <sub>50</sub> of 2.5 nM, 27.4 nM, 85 nM and 1602 nM for p110 $\delta$ , P110 $\gamma$ , p110 $\beta$ and p110 $\alpha$ , respectively.                                                                                                         |
|          | 0.004         | 0.070        | 0.009         | 0.004         | BEZ-235, Dactolisib, NVP-BEZ-235        | 0.004 / 0.075 / 0.005 / 0.007                                                                                                      | Dactolisib (BEZ235, NVP-BEZ235) is a dual ATP-competitive PI3K and mTOR inhibitor for p110 $\alpha/\gamma/\delta/\beta$ and mTOR(p70S6K) with IC <sub>50</sub> of 4 nM /5 nM /7 nM /75 nM /6 nM in cell-free assays, respectively. Inhibits ATR with IC <sub>50</sub> of 21 nM in 3T3TopBP1-ER cell.    |
|          | 0.019         | 0.15         | 0.12          | 0.037         | BKM-120, Buparlisib, NVP-BKM120         | 0.052 / 0.17 / 0.26 / 0.12                                                                                                         | Buparlisib (BKM120, NVP-BKM120) is a selective PI3K inhibitor of p110 $\alpha/\beta/\delta/\gamma$ with IC <sub>50</sub> of 52 nM/166 nM/116 nM/262 nM in cell-free assays, respectively. Reduced potency against VPS34, mTOR, DNAPK, with little activity to PI4K $\beta$ . Phase 2.                   |
|          | 0.002         | 0.029        | 0.013         | 0.002         | GDC-0941, Pictilisib, RG-7321           | 0.003 / ~0.033 / ~0.075 / 0.003                                                                                                    | Pictilisib (GDC-0941) is a potent inhibitor of PI3K $\alpha/\delta$ with IC <sub>50</sub> of 3 nM in cell-free assays, with modest selectivity against p110 $\beta$ (11-fold) and p110 $\gamma$ (25-fold). Phase 2.                                                                                     |
|          | 0.005         | 0.049        | 0.037         | 0.004         | KU-0060648                              | 0.004 / 0.0005 / 0.59 / 0.0001                                                                                                     | KU-0060648 is a dual inhibitor of DNA-PK and PI3K $\alpha$ , PI3K $\beta$ , PI3K $\delta$ with IC <sub>50</sub> of 8.6 nM and 4 nM, 0.5 nM, 0.1 nM respectively, less inhibition of PI3K $\gamma$ with IC <sub>50</sub> of 0.59 $\mu$ M.                                                                |
|          | 0.096         | 0.17         | 0.004         | 0.008         | PIK-93                                  | 0.039 / 0.59 / 0.016 / 0.12                                                                                                        | PIK-93 inhibits PI3K $\gamma$ and PI4KIII $\beta$ , with IC <sub>50</sub> values of 16 nM and 19 nM, respectively. PIK-93 also inhibits other members of PI3Ks, including PI3K $\alpha$ , $\beta$ , and $\delta$ , with IC <sub>50</sub> values of 39 nM, 0.59 $\mu$ M, and 0.12 $\mu$ M, respectively. |
|          | 1.3           | 0.038        | 1.7           | 0.038         | TGX-221                                 | na / 0.005 / na / 0.21                                                                                                             | The activity of TGX-221 against different isoforms is measured in an in vitro PI3K assay using multiple preparations of recombinant p85/p110. TGX-221 show slow potent to p110 $\delta$ with IC <sub>50</sub> of 211 nM TGX-221 p110 $\beta$ -specific, IC <sub>50</sub> =5 nM                          |
|          | 0.002         | 0.012        | 0.005         | 0.002         | ZSTK-474                                | 0.016 / 0.017 / 0.053 / 0.006                                                                                                      | ZSTK474 inhibits the activities of recombinant p110 $\beta$ , - $\gamma$ , and - $\delta$ with IC <sub>50</sub> of 17 nM, 53 nM, and 6 nM, respectively....<br>alpha16                                                                                                                                  |

## 2. Description of Cellular Assay

### Materials

THP-1 were obtained from ATCC. 2-mercaptoethanol, Hepes solution 1M, 7.5% BSA were obtained from Invitrogen. Recombinant human MCP-1 from PeproTech; Phospho-Akt antibody (S473) AlexaFluor647 conjugated from Cell SignalingTechnology; Formaldehyde 37% from Sigma; Methanol from JT Baker; 96-well plates, black with clear bottom and 96 well V bottom polypropylene plates from Costar.

### Methods

#### MCP-1 stimulated pAKT in THP-1 cells

THP-1 cells (human monocytic cell line) were re-suspended at a density of  $5 \times 10^5$  cells/ml in serum-starvation medium (RPMI, 0.1% BSA, 50 U/ml Pen/Strep, 2 mM L-glutamine, 0.05 mM 2-mercaptoethanol) for 24 h at 37 °C, 5% CO<sub>2</sub>. Cells were then diluted to a density of  $2.5 \times 10^6$  cells in starvation medium and plated in 96-well plates. Cells were pretreated with compounds for 1 h at 37 °C, 5% CO<sub>2</sub>. Cells were then stimulated by the addition 20 nM MCP-1 for 3 min. This leads to PI3K $\alpha$ -induced phosphorylation of Akt at the Threonine 308 and Serine 473 sites. Cells were fixed rapidly with formaldehyde (4% final concentration). Cells were washed and permeabilized with 90% cold methanol at -20 °C for 30 min. Cells were washed with PBS and then stained with pAkt antibody for 30 min. at room temperature. Cells were washed and were re-suspended in PBS. Plate was read on a BD FACS Calibur and data was analyzed using FlowJo. IC<sub>50</sub>'s were calculated using the % pAKT positive values.

### 3. Synthetic Procedures and Characterization of Compounds

**General Information.** All of the reagents were obtained commercially without requiring additional purification. The reactions were monitored on a Waters Acquity Classic UPLC-MS coupled to a single quadrupole mass spectrometer (Model SQ2, Waters). Analytical samples were separated using a Waters 1.7  $\mu\text{m}$  CSH column (2.1 x 30 mm) in which a gradient of 5-95%  $\text{CH}_3\text{CN}$  in 0.05% (v/v) TFA in  $\text{H}_2\text{O}$  was applied with a flow rate of 1.2 mL/min over 1.4 min. Compound purifications were done on ISCO Combiflash systems using pre-packed silica or C18 columns. NMR spectra were produced from a Bruker Avance-III (400 MHz) with proton resonances measured in parts per million (ppm) downfield from tetramethylsilane (TMS) at 400 MHz.  $^{13}\text{C}$  NMR spectra and  $^{19}\text{F}$  NMR spectra were measured on the same instrument, operating at 101 MHz and 376 MHz, respectively. High-resolution mass spectra (HRMS) were collected by direct infusion on a Thermo QExactive. HRMS samples were prepared in  $\text{CH}_3\text{CN}$  and infused with a flow rate of 5  $\mu\text{L}/\text{min}$ . Electrospray ionization (ESI) in positive ion mode was employed with a spray voltage of 4.0 kV, with the mass resolution set to 35,000.

**6-(5,6-Dimethoxy-3-pyridyl)-4-methyl-2-[1-(2,2,2-trifluoroethyl)pyrazol-4-yl]-1H-pyrrolo[3,4-c]pyridin-3-one (2).** A 2-necked 250 mL round bottom flask was charged with 6-chloro-4-methyl-2-[1-(2,2,2-trifluoroethyl)pyrazol-4-yl]-1H-pyrrolo[3,4-c]pyridin-3-one (129 mg, 0.390 mmol), 2,3-dimethoxy-5-(4,4,5,5-tetramethyl-1,3,2-dioxaborolan-2-yl)pyridine (134 mg, 0.507 mmol), DMF (4 mL), and sodium carbonate (780  $\mu\text{L}$  of 1 M, 0.78 mmol). Nitrogen was bubbled through the solution for 0.5 h, after which  $\text{Pd}(\text{PPh}_3)_4$  (23 mg, 0.0195 mmol). Nitrogen bubbling continued for a further 5 min and the reaction vessel was placed on a heating block set to 110  $^\circ\text{C}$ . The reaction was allowed to stir overnight. In the following morning, the mixture was cooled to room temperature. Water was added to the mixture and was extracted twice with ethyl acetate. The combined organic layers were dried over sodium sulfate ( $\text{Na}_2\text{SO}_4$ ) and filtered through a pad of Celite. The layers were concentrated under reduced pressure and purified by silica gel column chromatography (100% ethyl acetate). Yield: (20 mg, 77 %); white solid;  $^1\text{H}$  NMR (400 MHz,  $\text{DMSO}-d_6$ )  $\delta$  8.45 (d,  $J = 2.0$  Hz, 1H), 8.35 (s, 1H), 8.02 (s, 1H), 7.90 (d,  $J = 1.9$  Hz, 1H), 7.89 (s, 1H), 5.18 (q,  $J = 9.0$  Hz, 2H), 4.82 (s, 2H), 3.90 (s, 3H), 3.88 (s, 3H), 2.81 (s, 3H);  $^{13}\text{C}$  NMR (101 MHz,  $\text{DMSO}-d_6$ )  $\delta$  164.7, 156.2, 155.4, 155.3, 152.2, 144.1, 136.2, 125.2 (q,  $J = 365.7, 282.3, 280.2$  Hz), 116.3, 112.5, 55.9, 53.8, 52.1 (q,  $J = 33.3$  Hz), 49.7, 25.4, 20.9;  $^{19}\text{F}$  NMR (376 MHz,  $\text{DMSO}-d_6$ )  $\delta$  -70.3; HRMS (ESI)  $m/z$ :  $[\text{M} + \text{H}]^+$  calcd for  $[\text{C}_{20}\text{H}_{18}\text{F}_3\text{N}_5\text{O}_3\text{H}]^+$ : 434.1435, found: 434.1436.

**N-prop-2-ynyl-N-[1-(2,2,2-trifluoroethyl)pyrazol-4-yl]but-2-ynamide (5).** A 2-neck 250 mL flask under nitrogen was charged with N-prop-2-ynyl-1-(2,2,2-trifluoroethyl)pyrazol-4-amine (4.41 g, 21.71 mmol, 1.0 eq), but-2-ynoic acid (2.19 g, 26.05 mmol, 1.2 eq), and DMAP (140 mg, 1.146 mmol, 0.05 eq) in DCM (75 mL). DIPEA (11.4 mL, 65.45 mmol, 3.0 eq) was added in one portion to this solution to result in a color change from pale yellow to golden yellow. The solution was then cooled in an ice-water bath, after which EDCI (4 g, 25.77 mmol, 1.2 eq) was added in one portion. The ice-water bath was removed after 5 min, and the solution was allowed to stir overnight at room temperature. Water was added the following morning followed by two additional extractions with DCM. The combined organic layers were passed through a Biotage phase separator and subsequently concentrated under reduced pressure. The residue was purified via reverse phase column chromatography (275g Gold C18Aq column, 10-95% ACN/TFA in aq. TFA). Combined fractions were partially concentrated to remove the acetonitrile, and the resulting water layer was extracted three times with dichloromethane. The organic layers were passed through a Biotage phase separator and concentrated under reduced pressure to afford **5** (2.6 g, 44% yield). white solid;  $^1\text{H}$  NMR (300 MHz, Chloroform- $d$ , one rotamer annotated) 8.12 (s, 1H), 7.72 (s, 1H), 4.73 (d,  $J = 2.5$  Hz, 2H), 4.76 - 4.63 (m, 2H), 2.36 (t,  $J = 2.4$  Hz, 1H), 2.07

(s, 3H);  $^{13}\text{C}$  NMR (101 MHz, Chloroform-*d*)  $\delta$  154.2 (rot), 151.9 (rot), 138.8 (rot), 132.8 (rot), 128.7 (rot), 127.0 - 118.5 (qd, rot), 91.7 (rot), 91.3 (rot), 78.2 (rot), 77.6 (rot), 73.8 (rot), 73.1 (rot), 72.8 (rot), 72.7 (rot), 53.38 (qd,  $J = 35.2, 15.4$  Hz, rot), 40.00 (rot), 37.64 (rot), 4.25 (rot), 3.68 (rot).  $^{19}\text{F}$  NMR (376 MHz, Chloroform-*d*)  $\delta$  -71.6 (rot), -71.9 (rot); HRMS (ESI)  $m/z$ :  $[\text{M} + \text{H}]^+$  calcd for  $[\text{C}_{12}\text{H}_{10}\text{F}_3\text{N}_3\text{OH}]^+$ : 270.0849, found: 270.0849.

***N*-prop-2-ynyl-1-(2,2,2-trifluoroethyl)pyrazol-4-amine (7)**. A 2-neck 250 mL flask under nitrogen was charged with 1-(2,2,2-trifluoroethyl)pyrazol-4-amine (8.55 g, 51.78 mmol, 1.0 eq) and potassium carbonate (21.5 g, 155.6 mmol, 3 eq) in DMF (100 mL). The stirring solution was cooled to 0 °C via an ice-water bath, before 3-bromoprop-1-yne in toluene (4.6 mL of 80 %w/w, 41.30 mmol, 0.8 eq) was added in one portion. The ice-water bath was removed after 5 min. After 3 h, water and brine was added to the solution and the crude product was extracted twice with ethyl acetate. The organic layers were combined and dried over sodium sulfate ( $\text{Na}_2\text{SO}_4$ ) and concentrated under reduced pressure. The crude residue was purified via reverse phase column chromatography (275 g Gold C18Aq column, 10-95% ACN/TFA in aq. TFA). Combined fractions were partially concentrated and the resulting water layer was extracted three times with dichloromethane. The organic layers were passed through a Biotage phase separator and concentrated to afford **7** (4.51 g, 43% yield, white solid).  $^1\text{H}$  NMR (400 MHz, Chloroform-*d*)  $\delta$  7.29 (d,  $J = 1.0$  Hz, 1H), 7.13 (s, 1H), 4.59 (q,  $J = 8.5$  Hz, 2H), 3.77 (q,  $J = 2.5$  Hz, 2H), 3.21 (s, 1H), 2.24 (t,  $J = 2.4$  Hz, 1H);  $^{13}\text{C}$  NMR (101 MHz, Chloroform-*d*)  $\delta$  133.6, 131.8, 123.0 (q,  $J = 279.9$  Hz), 117.3, 81.0, 71.8, 53.3 (q,  $J = 34.9$  Hz), 37.0.  $^{19}\text{F}$  NMR (376 MHz, Chloroform-*d*)  $\delta$  -71.8; HRMS (ESI)  $m/z$ :  $[\text{M} + \text{H}]^+$  calcd for  $[\text{C}_8\text{H}_8\text{F}_3\text{N}_3\text{H}]^+$ : 204.0743, found: 204.0742

**General Procedure for [2+2+2] Cyclotrimerization Reactions (8, 10-22)**.  $\text{RuCp}^*(\text{COD})\text{Cl}$  (0.05 eq) and the isocyanate (1.0 eq) were mixed with DCE (1 mL) in a 20 mL dram vial while stirring under nitrogen. To this solution was added *N*-prop-2-ynyl-*N*-[1-(2,2,2-trifluoroethyl)pyrazol-4-yl]but-2-ynamide (100 mg, 1.0 eq) in DCE (2.2 mL) in a dropwise fashion over a 15 minute period at room temperature. Once all of the 1,6-diyne was added, the vial was placed on a heating block set to 60 °C. The reactions were monitored via LCMS and went to completion within 1 h. The reactions were then cooled to room temperature and concentrated under reduced pressure. The residues were purified by preparative flash chromatography, either via silica gel chromatography (24 g Gold Silica column, 40-100% ethyl acetate in dichloromethane), or reverse phase chromatography (30 g C18 column, 10-95%  $\text{CH}_3\text{CN}$  in 0.05% (v/v) TFA in  $\text{H}_2\text{O}$ ), as was appropriate.

**Ethyl 4-methyl-3,6-dioxo-2-(1-(2,2,2-trifluoroethyl)-1H-pyrazol-4-yl)-1, 2, 3, 6-tetrahydro-5H-pyrrolo [3, 4-c]pyridine-5-carboxylate (8)**. Yield: (179 mg, 47%); white solid;  $^1\text{H}$  NMR (400 MHz,  $\text{DMSO-}d_6$ )  $\delta$  8.29 (s, 1H), 7.84 (s, 1H), 6.51 (s, 1H), 5.18 (q,  $J = 9.1$  Hz, 2H), 4.74 (d,  $J = 1.5$  Hz, 2H), 4.51 (q,  $J = 7.1$  Hz, 2H), 2.67 (s, 3H), 1.36 (t,  $J = 7.1$  Hz, 3H);  $^{13}\text{C}$  NMR (101 MHz,  $\text{DMSO-}d_6$ )  $\delta$  163.3, 160.7, 153.3, 152.0, 145.3, 131.3, 124.1 (q,  $J = 279.7$  Hz), 123.5, 121.8, 110.2, 109.8, 66.9, 52.1 (q,  $J = 33.4$  Hz), 49.1, 14.0, 13.3;  $^{19}\text{F}$  NMR (376 MHz,  $\text{DMSO-}d_6$ )  $\delta$  -70.3; HRMS (ESI)  $m/z$ :  $[\text{M} + \text{H}]^+$  calcd for  $[\text{C}_{16}\text{H}_{15}\text{F}_3\text{N}_4\text{O}_4\text{H}]^+$ : 385.1118, found: 385.1115.

**4-Methyl-5-((tetrahydrofuran-2-yl)methyl)-2-(1-(2,2,2-trifluoroethyl)-1H-pyrazol-4-yl)-1,2-dihydro-3H-pyrrolo[3,4-c]pyridine-3,6(5H)-dione (10)**. Yield: (84 mg, 58 %); white solid;  $^1\text{H}$  NMR (400 MHz,  $\text{DMSO-}d_6$ )  $\delta$  8.29 - 8.25 (m, 1H), 7.82 (d,  $J = 0.7$  Hz, 1H), 6.42 (s, 1H), 5.17 (q,  $J = 9.1$  Hz, 2H), 4.67 (d,  $J = 1.4$  Hz, 2H), 4.21 (dd,  $J = 13.7, 2.9$  Hz, 1H), 4.11 (dtd,  $J = 9.6, 6.9, 2.8$  Hz, 1H), 3.95 (dd,  $J = 13.6, 8.8$  Hz, 1H), 3.78 (dt,  $J = 8.3, 6.7$  Hz, 1H), 3.61 (td,  $J = 7.8, 6.1$  Hz, 1H), 2.87 (s, 3H), 2.07 - 1.96 (m, 1H), 1.96 - 1.86 (m, 1H), 1.86 - 1.76 (m, 1H), 1.62 (ddt,  $J = 12.0, 8.4, 7.0$  Hz, 1H);  $^{13}\text{C}$  NMR (101 MHz,  $\text{DMSO-}d_6$ )  $\delta$  164.4, 162.3, 151.3 (d,  $J = 2.7$  Hz), 131.3, 124.1 (q,  $J = 279.8$  Hz), 123.8, 121.6, 109.1, 109.0, 76.6, 67.8, 52.1 (q,  $J = 33.4$  Hz),

48.5, 48.06, 29., 25.7, 14.4; <sup>19</sup>F NMR (376 MHz, DMSO-*d*<sub>6</sub>) δ -70.3; HRMS (ESI) *m/z*: [M + H]<sup>+</sup> calcd for [C<sub>18</sub>H<sub>19</sub>F<sub>3</sub>N<sub>4</sub>O<sub>3</sub>H]<sup>+</sup>: 397.1482, found: 397.1484.

**5-(2-Chloroethyl)-7-methyl-2-[1-(2,2,2-trifluoroethyl)pyrazol-4-yl]-3H-pyrrolo[3,4-c]pyridine-1,6-dione and 5-(2-chloroethyl)-4-methyl-2-[1-(2,2,2-trifluoroethyl)pyrazol-4-yl]-1H-pyrrolo[3,4-c]pyridine-3,6-dione (11).** (*Mixture of inseparable regioisomers*): Yield: (71 mg, 58%); white solid; <sup>1</sup>H NMR (400 MHz, DMSO-*d*<sub>6</sub>) δ 8.40 (s, 1H), 8.29 (s, 1H), 7.94 (s, 1H), 7.84 - 7.81 (m, 1H), 7.80 (s, 1H), 6.46 (s, 1H), 5.21 (ddd, *J* = 15.2, 9.1, 6.5 Hz, 6H), 5.14 (d, *J* = 3.8 Hz, 2H), 4.94 (t, *J* = 9.0 Hz, 2H), 4.70 (d, *J* = 1.5 Hz, 2H), 4.35 (t, *J* = 6.6 Hz, 2H), 3.91 (t, *J* = 6.6 Hz, 2H), 3.02 (s, 3H), 2.91 (s, 3H); <sup>13</sup>C NMR (101 MHz, DMSO-*d*<sub>6</sub>) δ 164.2, 162.1 (d, *J* = 6.2 Hz), 161.8, 161.3, 151.6, 150.7, 150.0, 131.7, 131.3, 128.4 - 119.8 (m), 123.7, 122.9, 122.5, 121.7, 121.3, 109.6, 109.3, 102.4, 72.7, 52.7 - 51.6 (m), 50.5, 49.1, 48.6, 45.3, 41.2, 14.4, 14.2; <sup>19</sup>F NMR (376 MHz, DMSO-*d*<sub>6</sub>) δ -70.2, -70.2; HRMS (ESI) *m/z*: [M + H]<sup>+</sup> calcd for [C<sub>15</sub>H<sub>14</sub>ClF<sub>3</sub>N<sub>4</sub>O<sub>2</sub>H]<sup>+</sup>: 375.0830, found: 375.0831.

**5-(2,2-Dimethoxyethyl)-4-methyl-2-(1-(2,2,2-trifluoroethyl)-1H-pyrazol-4-yl)-1,2-dihydro-3H-pyrrolo[3,4-c]pyridine-3,6(5H)-dione (12).** Yield: (149 mg, 65%); white solid; <sup>1</sup>H NMR (400 MHz, DMSO-*d*<sub>6</sub>) δ 8.28 (s, 1H), 7.82 (s, 1H), 6.43 (s, 1H), 5.17 (q, *J* = 9.1 Hz, 2H), 4.68 (d, *J* = 1.4 Hz, 2H), 4.60 (t, *J* = 5.4 Hz, 1H), 4.11 (d, *J* = 5.4 Hz, 2H), 3.32 (s, 6H), 2.86 (s, 3H); <sup>13</sup>C NMR (101 MHz, DMSO-*d*<sub>6</sub>) δ 164.3, 162.4, 151.4 (d, *J* = 18.0 Hz), 131.3, 124.1 (q, *J* = 279.8 Hz), 123.8, 121.7, 109.4, 109.0, 102.5, 55.5, 52.1 (q, *J* = 33.3 Hz), 48.6, 46.4, 14.2; <sup>19</sup>F NMR (376 MHz, DMSO-*d*<sub>6</sub>) δ -70.3; HRMS (ESI) *m/z*: [M + H]<sup>+</sup> calcd for [C<sub>17</sub>H<sub>19</sub>F<sub>3</sub>N<sub>4</sub>O<sub>4</sub>H]<sup>+</sup>: 401.1431, found: 401.1430.

**5-(2,2-Difluoroethyl)-4-methyl-2-[1-(2,2,2-trifluoroethyl)pyrazol-4-yl]-1H-pyrrolo[3,4-c]pyridine-3,6-dione (13).** Yield: (68 mg, 48%); white solid; <sup>1</sup>H NMR (400 MHz, DMSO-*d*<sub>6</sub>) δ 8.31 - 8.26 (m, 1H), 7.83 (d, *J* = 0.7 Hz, 1H), 6.51 (s, 1H), 6.31 (tt, *J* = 55.8, 4.2 Hz, 1H), 5.17 (q, *J* = 9.1 Hz, 2H), 4.71 (d, *J* = 1.5 Hz, 2H), 4.52 (td, *J* = 14.1, 4.2 Hz, 2H), 2.85 (s, 3H); <sup>13</sup>C NMR (101 MHz, DMSO-*d*<sub>6</sub>) δ 164.0, 162.3, 151.9, 150.6, 131.3, 124.1 (q, *J* = 279.8 Hz), 123.6, 121.7, 114.2 (t, *J* = 241.5 Hz), 110.0, 109.3, 52.1 (q, *J* = 33.5 Hz), 48.6, 45.6 (t, *J* = 28.2 Hz), 14.1; <sup>19</sup>F NMR (376 MHz, DMSO-*d*<sub>6</sub>) δ -70.3, -120.7; HRMS (ESI) *m/z*: [M + H]<sup>+</sup> calcd for [C<sub>15</sub>H<sub>13</sub>F<sub>5</sub>N<sub>4</sub>O<sub>2</sub>H]<sup>+</sup>: 377.1031, found: 377.1031.

**Ethyl 2-[4-methyl-3,6-dioxo-2-[1-(2,2,2-trifluoroethyl)pyrazol-4-yl]-1H-pyrrolo[3,4-c]pyridin-5-yl]acetate (14).** Yield: (79 mg, 65%); white solid; <sup>1</sup>H NMR (400 MHz, DMSO-*d*<sub>6</sub>) δ 8.33 (s, 1H), 7.90 - 7.84 (m, 1H), 6.52 (s, 1H), 5.23 (q, *J* = 9.1 Hz, 2H), 4.93 (s, 2H), 4.78 (d, *J* = 1.4 Hz, 2H), 4.22 (q, *J* = 7.1 Hz, 2H), 2.81 (s, 3H), 1.27 (t, *J* = 7.1 Hz, 3H); <sup>13</sup>C NMR (101 MHz, DMSO-*d*<sub>6</sub>) δ 168.3, 164.1, 162.1, 151.7, 150.4, 131.3, 124.1 (q, *J* = 283.6, 278.3, 274.2 Hz), 109.5, 109.0, 61.8, 52.1 (q, *J* = 33.4 Hz), 48.7, 45.6, 14.5, 14.0; <sup>19</sup>F NMR (282 MHz, DMSO-*d*<sub>6</sub>) δ -70.3; HRMS (ESI) *m/z*: [M + H]<sup>+</sup> calcd for [C<sub>17</sub>H<sub>17</sub>F<sub>3</sub>N<sub>4</sub>O<sub>4</sub>H]<sup>+</sup>: 399.1275, found: 399.1276.

**4-Methyl-5-(2-(methylthio)ethyl)-2-(1-(2,2,2-trifluoroethyl)-1H-pyrazol-4-yl)-1,2-dihydro-3H-pyrrolo[3,4-c]pyridine-3,6(5H)-dione (15).** Yield: (66 mg, 67%); white solid; <sup>1</sup>H NMR (400 MHz, DMSO-*d*<sub>6</sub>) δ 8.27 (d, *J* = 0.7 Hz, 1H), 7.82 (d, *J* = 0.7 Hz, 1H), 6.44 - 6.40 (m, 1H), 5.17 (q, *J* = 9.1 Hz, 2H), 4.68 (d, *J* = 1.5 Hz, 2H), 4.25 - 4.17 (m, 2H), 2.90 (s, 3H), 2.78 - 2.71 (m, 2H), 2.16 (s, 3H); <sup>13</sup>C NMR (101 MHz, DMSO-*d*<sub>6</sub>) δ 164.3, 162.1, 151.3, 150.4, 131.3, 124.1 (q, *J* = 279.7 Hz), 123.8, 121.6, 109.3, 109.2, 52.1 (q, *J* = 33.2 Hz), 48.6, 43.5, 30.9, 15.3, 13.9; <sup>19</sup>F NMR (376 MHz, DMSO-*d*<sub>6</sub>) δ -70.2; HRMS (ESI) *m/z*: [M + H]<sup>+</sup> calcd for [C<sub>16</sub>H<sub>17</sub>F<sub>3</sub>N<sub>4</sub>O<sub>2</sub>SH]<sup>+</sup>: 387.1103, found: 387.1096.

**4-Methyl-5-tetrahydropyran-4-yl-2-[1-(2,2,2-trifluoroethyl)pyrazol-4-yl]-1H-pyrrolo[3,4-c]pyridine-3,6-dione (16).** Yield: (93 mg, 42%); off-white solid; <sup>1</sup>H NMR (400 MHz, DMSO-*d*<sub>6</sub>) δ 8.28 (s, 1H), 7.81 (s, 1H), 6.32 (s, 1H), 5.17 (q, *J* = 9.1 Hz, 2H), 4.63 (s, 2H), 4.44 (t, *J* = 10.1

Hz, 1H), 4.32 (s, 1H), 3.82 (ddd,  $J = 20.8, 7.8, 3.4$  Hz, 2H), 3.31 (td,  $J = 10.7, 5.5$  Hz, 1H), 2.90 (s, 3H), 2.80 (d,  $J = 13.0$  Hz, 1H), 1.75 (tdd,  $J = 12.1, 9.4, 7.2, 3.6$  Hz, 3H);  $^{13}\text{C}$  NMR (101 MHz, DMSO- $d_6$ )  $\delta$  164.3, 163.2, 150.9, 131.3, 124.1 (q,  $J = 279.8$  Hz), 123.8, 121.6, 110.9, 109.8, 67.5, 67.2, 56.3, 52.2 (q,  $J = 33.5$  Hz), 48.2, 26.6, 25.1, 14.1;  $^{19}\text{F}$  NMR (376 MHz, DMSO- $d_6$ )  $\delta$  -70.3; HRMS (ESI)  $m/z$ :  $[\text{M} + \text{H}]^+$  calcd for  $[\text{C}_{18}\text{H}_{19}\text{F}_3\text{N}_4\text{O}_3\text{H}]^+$ : 397.1482, found: 397.1480

**4-Methyl-5-((methylsulfonyl)methyl)-2-(1-(2,2,2-trifluoroethyl)-1H-pyrazol-4-yl)-1,2-dihydro-3H-pyrrolo[3,4-c]pyridine-3,6(5H)-dione (17)** Yield: (83 mg, 59%); white solid;  $^1\text{H}$  NMR (400 MHz, DMSO- $d_6$ )  $\delta$  8.30 (s, 1H), 7.86 – 7.81 (m, 1H), 6.56 (s, 1H), 5.65 (s, 2H), 5.18 (q,  $J = 9.1$  Hz, 2H), 4.75 (d,  $J = 1.6$  Hz, 2H), 3.17 (s, 3H), 2.90 (s, 3H);  $^{13}\text{C}$  NMR (101 MHz, DMSO- $d_6$ )  $\delta$  163.78, 161.79, 152.27, 150.59, 131.40, 124.12 (q,  $J = 279.7$  Hz), 123.57, 121.86, 110.56, 109.44, 62.58, 52.10 (q,  $J = 33.5$  Hz), 48.79, 43.80, 14.46;  $^{19}\text{F}$  NMR (376 MHz, DMSO- $d_6$ )  $\delta$  -70.2; HRMS (ESI)  $m/z$ :  $[\text{M} + \text{H}]^+$  calcd for  $[\text{C}_{15}\text{H}_{15}\text{F}_3\text{N}_4\text{O}_4\text{SH}]^+$ : 405.0839, found: 405.0835.

**5-(3-Furyl)-4-methyl-2-[1-(2,2,2-trifluoroethyl)pyrazol-4-yl]-1H-pyrrolo[3,4-c]pyridine-3,6-dione (18)**. Yield: (44 mg, 35%);  $^1\text{H}$  NMR (400 MHz, DMSO- $d_6$ )  $\delta$  8.29 (s, 1H), 7.85 (d,  $J = 0.8$  Hz, 1H), 7.80 (dd,  $J = 2.1, 1.0$  Hz, 1H), 6.69 (dd,  $J = 3.3, 2.1$  Hz, 1H), 6.61 (dd,  $J = 3.3, 1.0$  Hz, 1H), 6.52 (q,  $J = 1.3$  Hz, 1H), 5.18 (q,  $J = 9.1$  Hz, 2H), 4.77 (d,  $J = 1.5$  Hz, 2H), 2.43 – 2.39 (m, 3H);  $^{13}\text{C}$  NMR (101 MHz, DMSO- $d_6$ )  $\delta$  163.6, 162.5, 152.7, 150.8, 143.0, 142.2, 131.3, 124.1 (q,  $J = 279.8$  Hz), 123.6, 121.8, 112.2, 110.2, 110.1, 108.2, 52.1 (q,  $J = 33.5$  Hz), 49.0, 14.3;  $^{19}\text{F}$  NMR (376 MHz, DMSO- $d_6$ )  $\delta$  -70.24; HRMS (ESI)  $m/z$ :  $[\text{M} + \text{H}]^+$  calcd for  $[\text{C}_{17}\text{H}_{13}\text{F}_3\text{N}_4\text{O}_3\text{H}]^+$ : 379.1013, found: 379.1012

**4-Methyl-5-(spiro[3.3]heptan-2-yl)-2-(1-(2,2,2-trifluoroethyl)-1H-pyrazol-4-yl)-1,2-dihydro-3H-pyrrolo[3,4-c]pyridine-3,6(5H)-dione (19)**. Yield: (39 mg, 80%);  $^1\text{H}$  NMR (400 MHz, DMSO- $d_6$ )  $\delta$  8.27 – 8.24 (m, 1H), 7.81 (d,  $J = 0.7$  Hz, 1H), 6.29 (d,  $J = 1.5$  Hz, 1H), 5.16 (q,  $J = 9.1$  Hz, 2H), 4.73 (p,  $J = 8.7$  Hz, 1H), 4.62 (d,  $J = 1.4$  Hz, 2H), 2.98 (td,  $J = 9.0, 2.8$  Hz, 2H), 2.80 (s, 3H), 2.36 (td,  $J = 8.4, 2.7$  Hz, 2H), 2.11 – 2.04 (m, 2H), 1.99 (dd,  $J = 8.4, 6.1$  Hz, 2H), 1.86 – 1.75 (m, 2H);  $^{13}\text{C}$  NMR (101 MHz, DMSO- $d_6$ )  $\delta$  164.4, 163.5, 150.5, 150.3, 131.2, 124.1 (q,  $J = 279.8$  Hz), 123.9, 121.5, 110.6, 109.3, 52.1 (q,  $J = 33.3$  Hz), 48.2, 37.2, 35.3, 35.0, 17.0, 14.5.  $^{19}\text{F}$  NMR (376 MHz, DMSO- $d_6$ )  $\delta$  -70.3; HRMS (ESI)  $m/z$ :  $[\text{M} + \text{H}]^+$  calcd for  $[\text{C}_{20}\text{H}_{21}\text{F}_3\text{N}_4\text{O}_2\text{H}]^+$ : 407.1689, found: 407.1691.

**4-Methyl-5-(1-methyl-1H-pyrazol-4-yl)-2-(1-(2,2,2-trifluoroethyl)-1H-pyrazol-4-yl)-1,2-dihydro-3H-pyrrolo[3,4-c]pyridine-3,6(5H)-dione (20)**. Yield: (44 mg, 64%);  $^1\text{H}$  NMR (400 MHz, DMSO- $d_6$ )  $\delta$  8.29 (s, 1H), 7.92 (s, 1H), 7.84 (d,  $J = 0.8$  Hz, 1H), 7.51 (q,  $J = 2.1, 1.5$  Hz, 1H), 6.49 – 6.45 (m, 1H), 5.19 (q,  $J = 9.1$  Hz, 2H), 4.74 (d,  $J = 1.5$  Hz, 2H), 3.91 (d,  $J = 0.8$  Hz, 3H), 2.47 (s, 3H);  $^{13}\text{C}$  NMR (101 MHz, DMSO- $d_6$ )  $\delta$  164.1, 162.6, 151.6, 151.4, 137.2, 131.3, 129.6, 124.1 (q,  $J = 279.8$  Hz), 123.8, 121.6, 118.4, 109.5, 109.4, 52.1 (q,  $J = 33.3$  Hz), 48.8, 15.9;  $^{19}\text{F}$  NMR (376 MHz, DMSO- $d_6$ )  $\delta$  -70.23; HRMS (ESI)  $m/z$ :  $[\text{M} + \text{H}]^+$  calcd for  $[\text{C}_{17}\text{H}_{15}\text{F}_3\text{N}_6\text{O}_2\text{H}]^+$ : 393.1281, found: 393.1283.

**5-(4-Fluorophenyl)-4-methyl-2-[1-(2,2,2-trifluoroethyl)pyrazol-4-yl]-1H-pyrrolo[3,4-c]pyridine-3,6-dione (21)**. Yield: (48 mg, 27 %);  $^1\text{H}$  NMR (400 MHz, DMSO- $d_6$ )  $\delta$  8.29 (s, 1H), 7.85 (s, 1H), 7.44 – 7.36 (m, 4H), 6.51 (s, 1H), 5.18 (q,  $J = 9.1$  Hz, 2H), 4.77 (s, 2H), 2.35 (s, 3H);  $^{13}\text{C}$  NMR (101 MHz, DMSO- $d_6$ )  $\delta$  164.16, 163.54, 162.68, 161.10, 151.82, 150.36, 134.28 (d,  $J = 3.0$  Hz), 131.33, 130.96 (d,  $J = 8.8$  Hz), 124.13 (q,  $J = 279.6$  Hz), 123.73, 121.68, 116.97 (d,  $J = 22.9$  Hz), 109.92, 109.39, 52.09 (q,  $J = 33.4$  Hz), 48.86, 15.81;  $^{19}\text{F}$  NMR (376 MHz,



DMSO-*d*<sub>6</sub>) δ -70.22, -113.09; HRMS (ESI) *m/z*: [M + H]<sup>+</sup> calcd for [C<sub>19</sub>H<sub>14</sub>F<sub>4</sub>N<sub>4</sub>O<sub>2</sub>H]<sup>+</sup>: 407.1126, found: 407.1127.

**4-Methyl-5-[(2R)-2-phenylcyclopropyl]-2-[1-(2,2,2-trifluoroethyl)pyrazol-4-yl]-1H-pyrrolo[3,4-c]pyridine-3,6-dione (22).** Yield: (56 mg, 12 %); <sup>1</sup>H NMR (400 MHz, DMSO-*d*<sub>6</sub>) δ 8.27 (d, *J* = 0.7 Hz, 1H), 7.82 (d, *J* = 0.7 Hz, 1H), 7.38 – 7.27 (m, 4H), 7.27 – 7.21 (m, 1H), 6.38 (q, *J* = 1.2 Hz, 1H), 5.17 (q, *J* = 9.1 Hz, 2H), 4.67 (d, *J* = 1.4 Hz, 2H), 3.12 (ddd, *J* = 7.6, 4.9, 3.8 Hz, 1H), 2.82 (s, 3H), 2.36 (ddd, *J* = 10.4, 7.0, 3.9 Hz, 1H), 1.73 (dt, *J* = 7.4, 6.5 Hz, 1H), 1.48 (ddd, *J* = 9.9, 6.4, 4.9 Hz, 1H); <sup>13</sup>C NMR (101 MHz, DMSO-*d*<sub>6</sub>) δ 164.33, 163.26, 152.97, 150.48, 140.62, 131.24, 128.72, 126.77, 126.62, 124.12 (q, *J* = 279.7 Hz), 123.81, 121.56, 109.83, 109.27, 52.08 (q, *J* = 33.5 Hz), 48.52, 37.45, 27.10, 19.43, 15.27; <sup>19</sup>F NMR (376 MHz, DMSO-*d*<sub>6</sub>) δ -70.23; HRMS (ESI) *m/z*: [M + H]<sup>+</sup> calcd for [C<sub>22</sub>H<sub>19</sub>F<sub>3</sub>N<sub>4</sub>O<sub>2</sub>H]<sup>+</sup>: 429.1533, found: 429.1531

**6-Chloro-4-methyl-2-(1-(2,2,2-trifluoroethyl)-1H-pyrazol-4-yl)-1,2-dihydro-3H-pyrrolo[3,4-c]pyridin-3-one (9).**

To a solution of ethyl 4-methyl-3,6-dioxo-2-[1-(2,2,2-trifluoroethyl)pyrazol-4-yl]-1H-pyrrolo[3,4-c]pyridine-5-carboxylate (614 mg, 1.58 mmol) in THF (10 mL) was added HCl (6M, 10 mL, 60 mmol) at rt. The mixture was heated at 95 °C overnight and then concentrated under reduced pressure. To this residue was added POCl<sub>3</sub> (15 mL) and the mixture heated at 95 °C under nitrogen for 3 h. The reaction mixture was concentrated under reduced pressure. Ice and EtOAc and ethyl acetate were added. On reaction room temperature the layers were separated and the combined organic layers were washed with brine, dried (Na<sub>2</sub>SO<sub>4</sub>) and concentrated under reduced pressure. The resulting residue was purified via silica gel chromatography (1:1 Petroleum ether: ethyl acetate, R<sub>f</sub> = 0.20) to afford (**2**) (356 mg, 68%, white solid). <sup>1</sup>H NMR (400 MHz, DMSO-*d*<sub>6</sub>) δ 8.35 (s, 1H), 7.88 (s, 1H), 7.66 (s, 1H), 5.18 (q, *J* = 9.1 Hz, 2H), 4.85 (s, 2H), 2.74 (s, 3H); <sup>13</sup>C NMR (101 MHz, DMSO-*d*<sub>6</sub>) δ 163.8, 157.4, 154.6, 151.2, 131.5, 125.5 (q, *J* = 279.1, 277.5 Hz), 125.1, 123.4, 122.0, 117.5, 52.1 (q, *J* = 33.5 Hz); <sup>19</sup>F NMR (376 MHz, DMSO-*d*<sub>6</sub>) δ -70.3; HRMS (ESI) *m/z*: [M + H]<sup>+</sup> calcd for [C<sub>13</sub>H<sub>10</sub>ClF<sub>3</sub>N<sub>4</sub>OH]<sup>+</sup>: 331.0568, found: 331.0569.

#### 4. Abbreviations:

|       |                                                                            |
|-------|----------------------------------------------------------------------------|
| CHAPS | 3-[(3-Cholamidopropyl)dimethylammonio]-1-propanesulfonate                  |
| DTT   | DL-Dithiothreitol                                                          |
| EGTA  | Ethylene glycol-bis(2-aminoethylether)- <i>N,N,N',N'</i> -tetraacetic acid |
| FBS   | Fetal Bovine Serum                                                         |
| HEPES | 4-(2-hydroxyethyl)-1-piperazineethanesulfonic acid                         |
